# Supplementary material
Source: bioRxiv or medRxiv preprint supplement (https://www.biorxiv.org/highwire/filestream/18983/field_highwire_adjunct_files/9/068940-8.zip)
Supplement: Supplementary file [file 068940-8.zip]

## T-cells

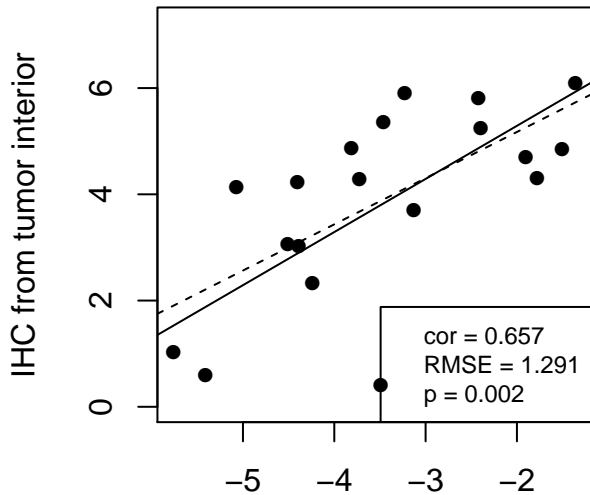

Whole FFPE gene expression

## CD8 T-cells

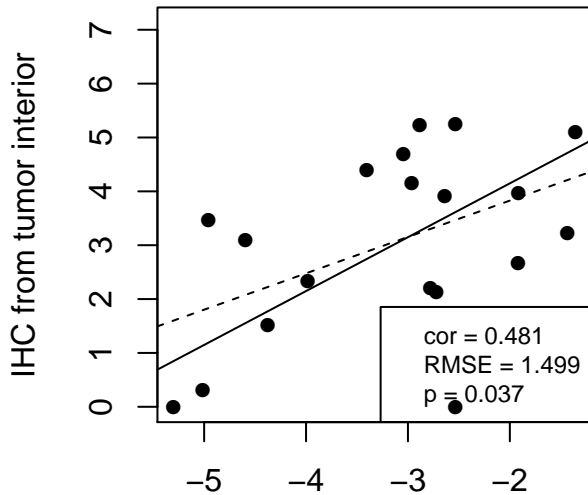

Whole FFPE gene expression
