# Supplementary material
Source: bioRxiv or medRxiv preprint supplement (https://www.biorxiv.org/highwire/filestream/18983/field_highwire_adjunct_files/9/068940-8.zip)

# T-cells

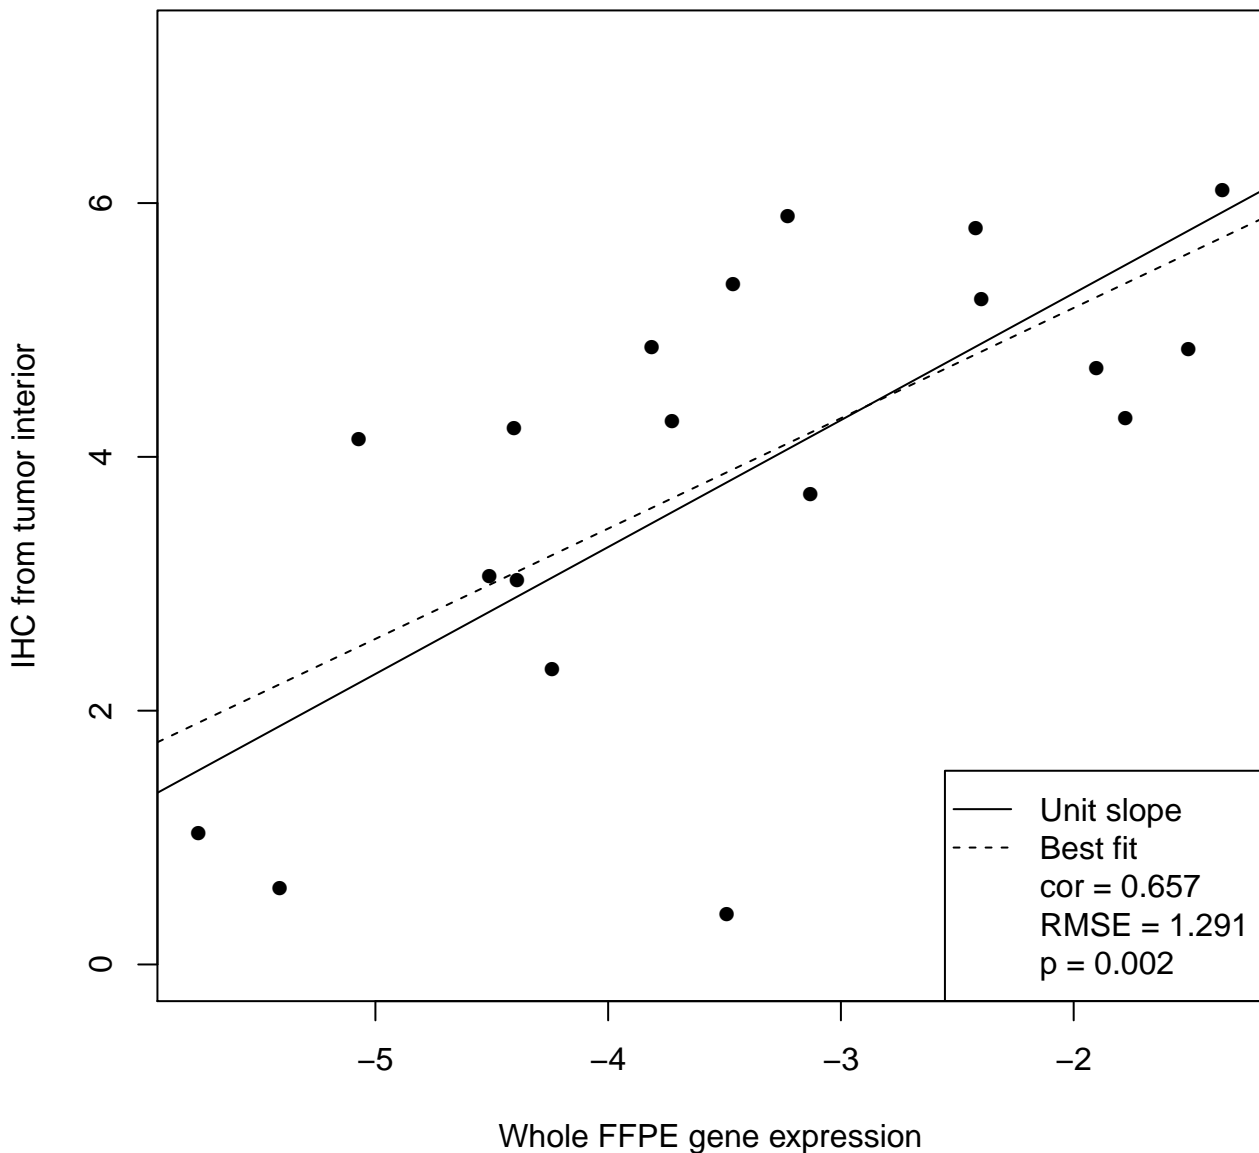

# T-cells (residuals)

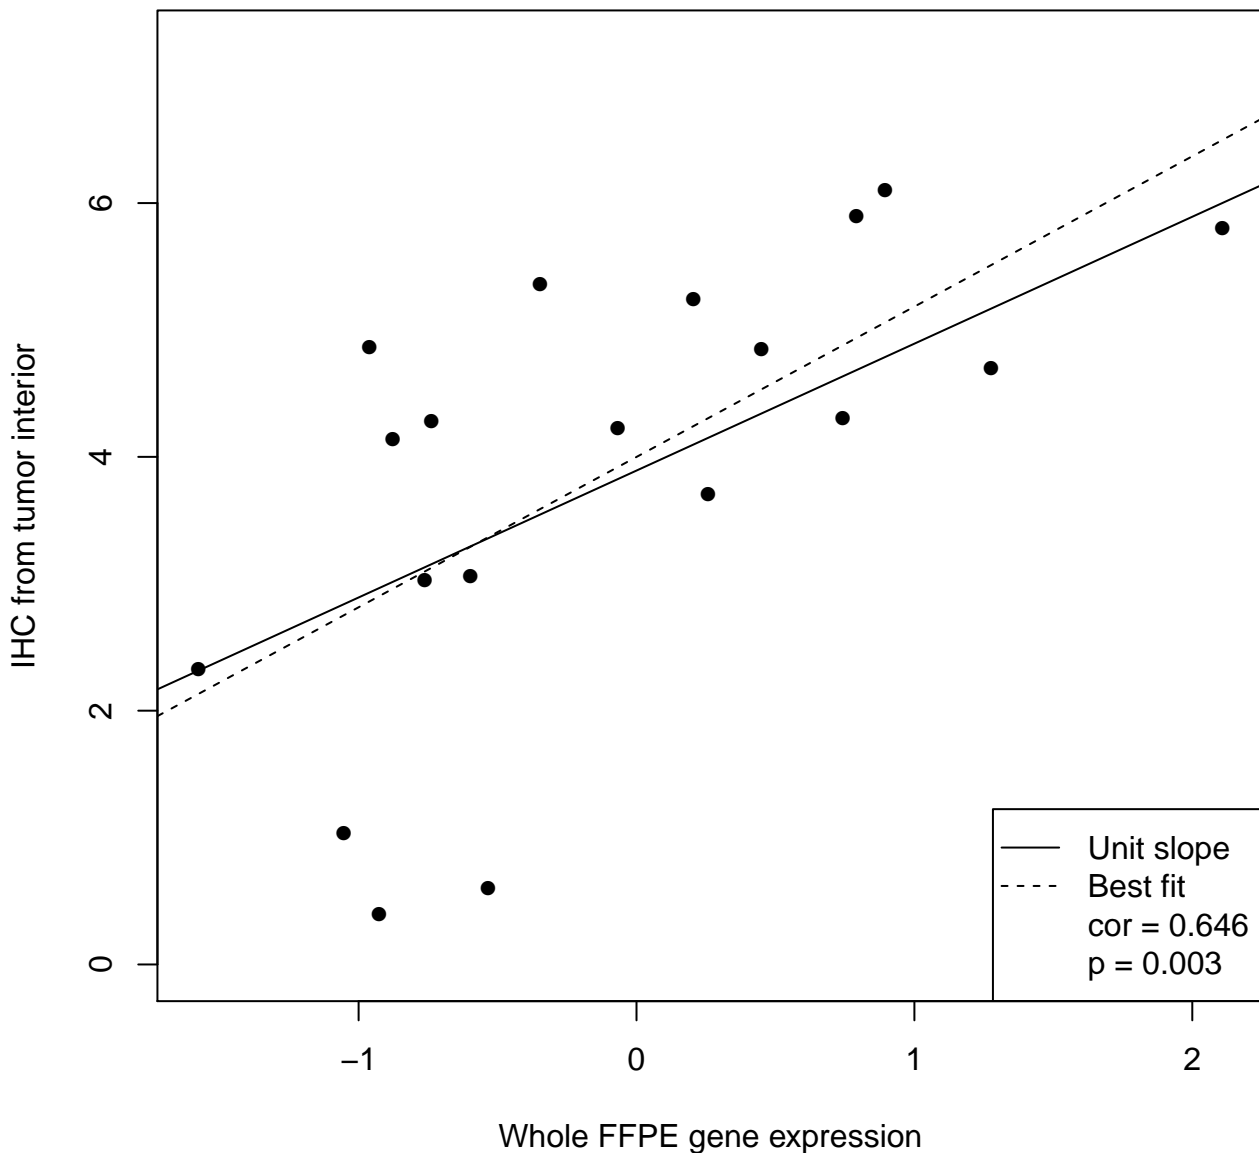

# T-cells

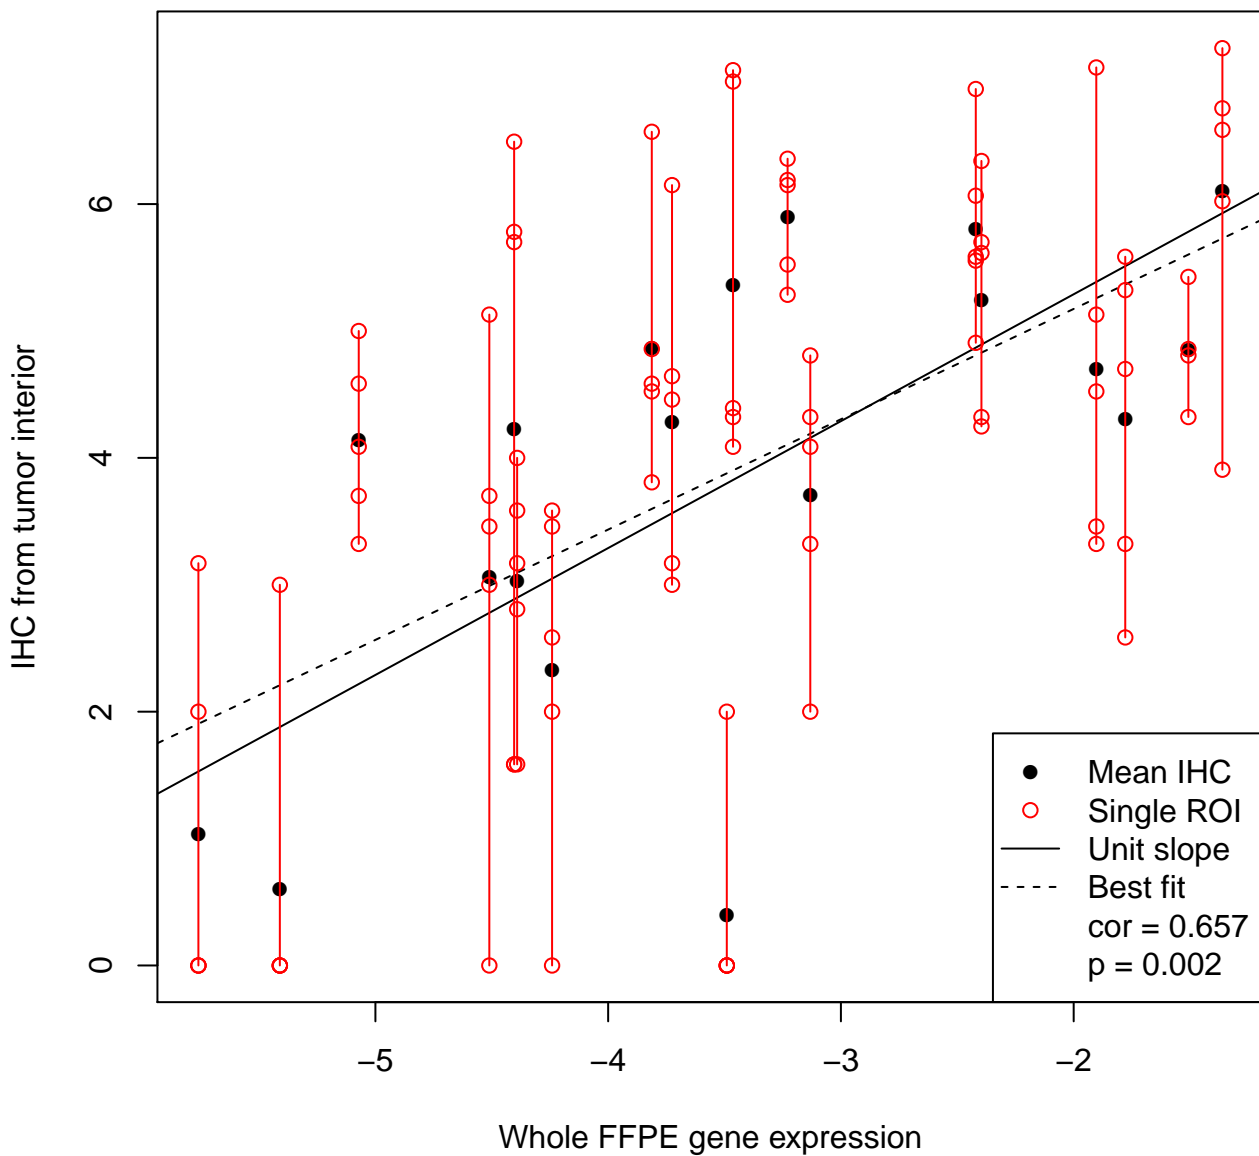

# CD8 T-cells

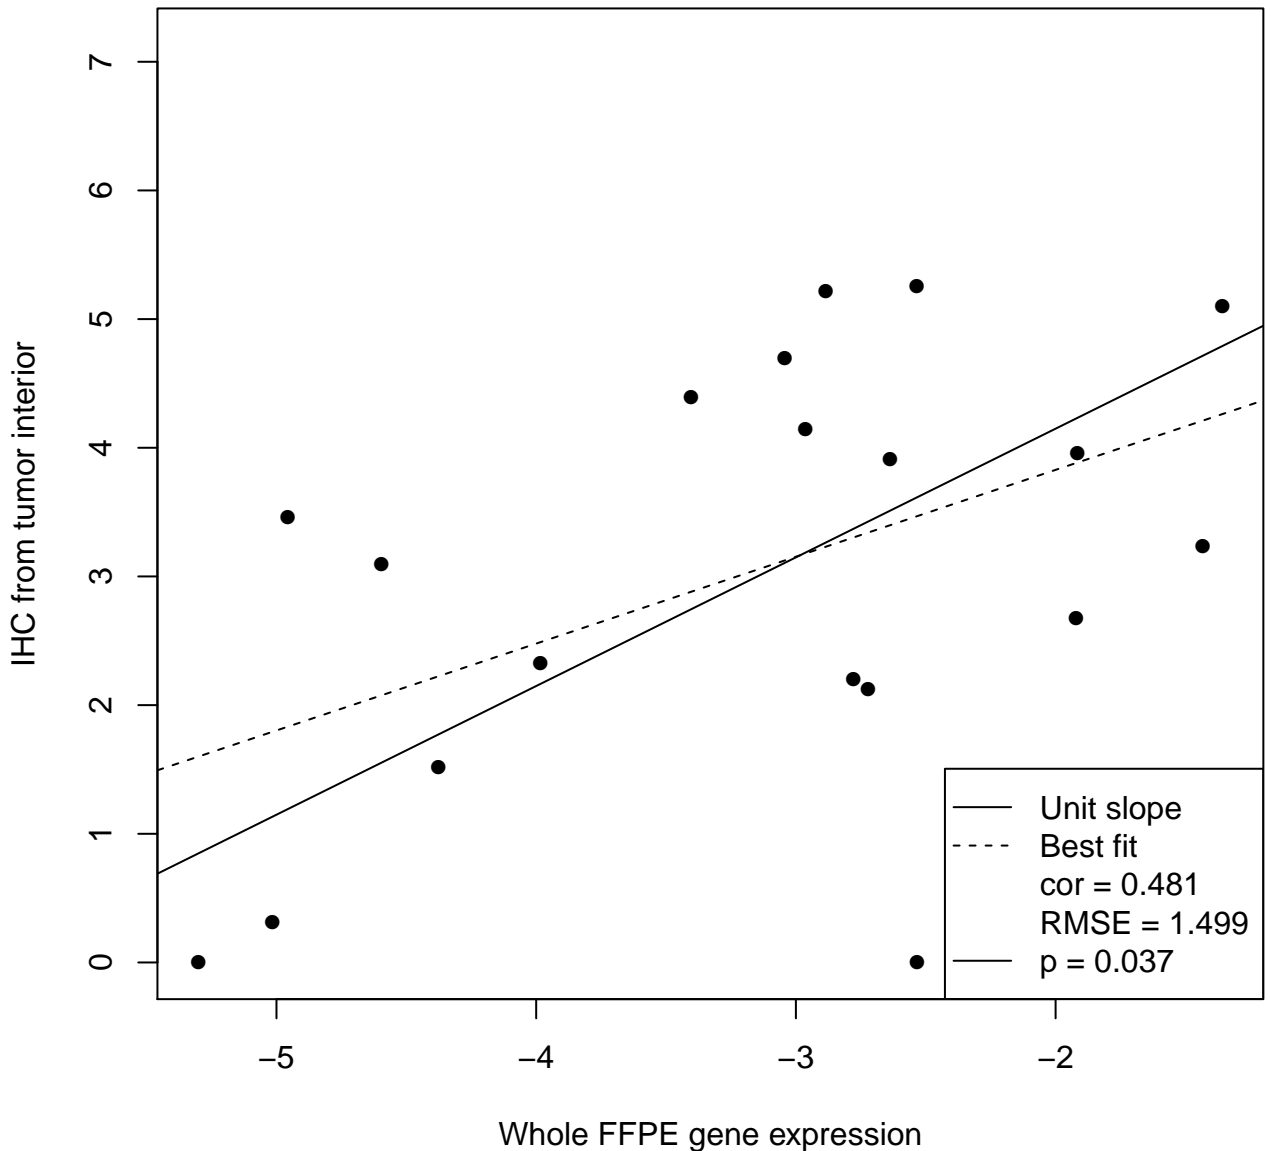

CD8 T-cells (residuals)

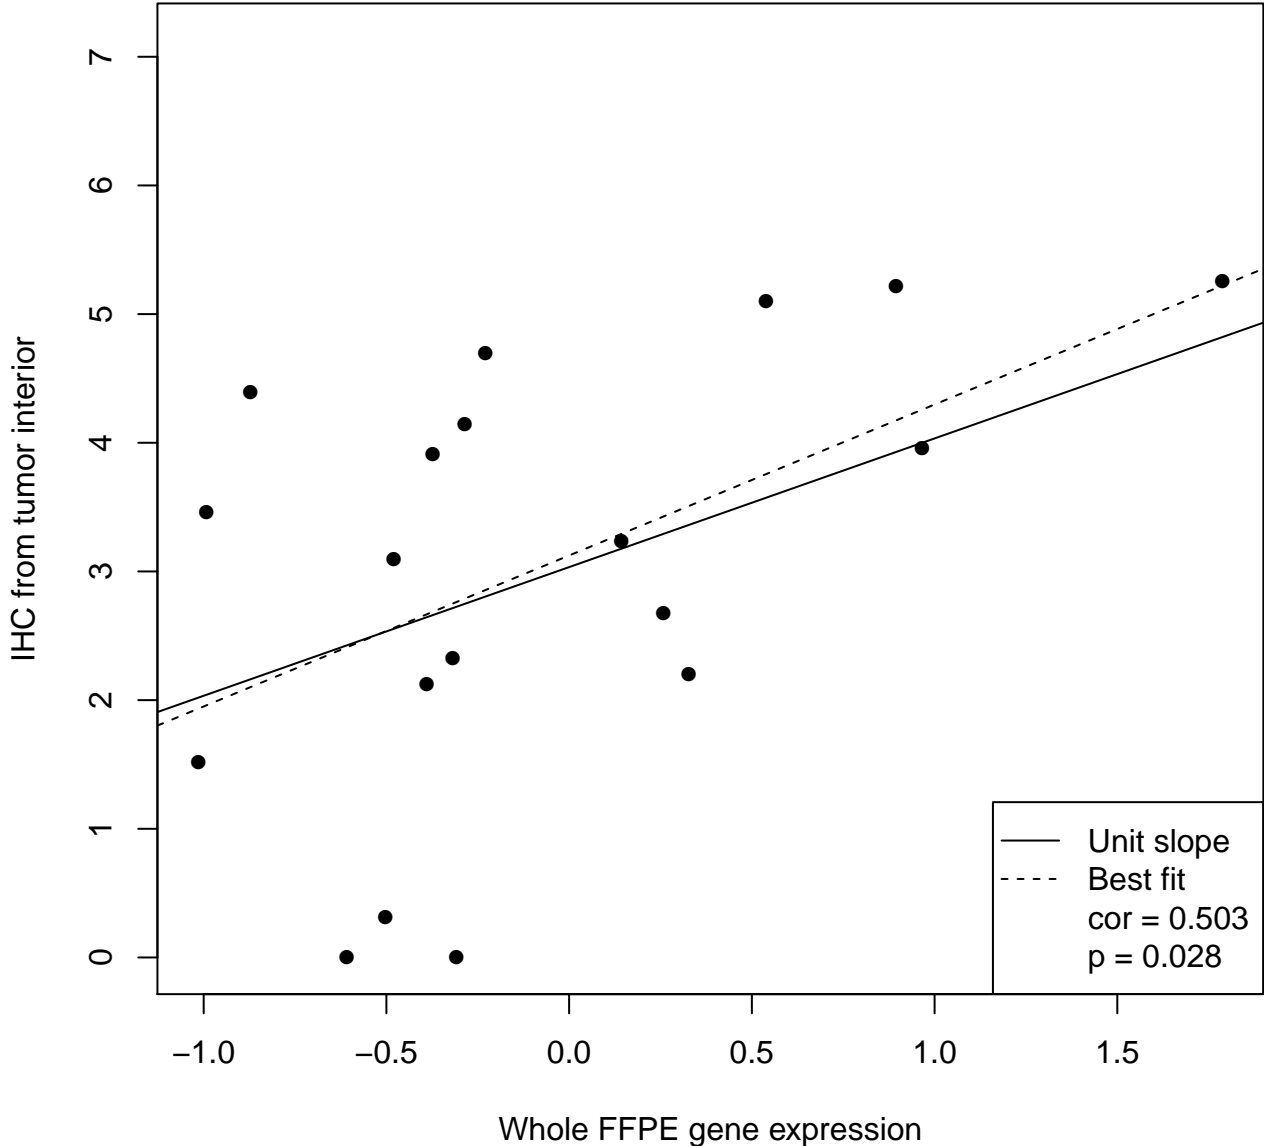

# CD8 T-cells

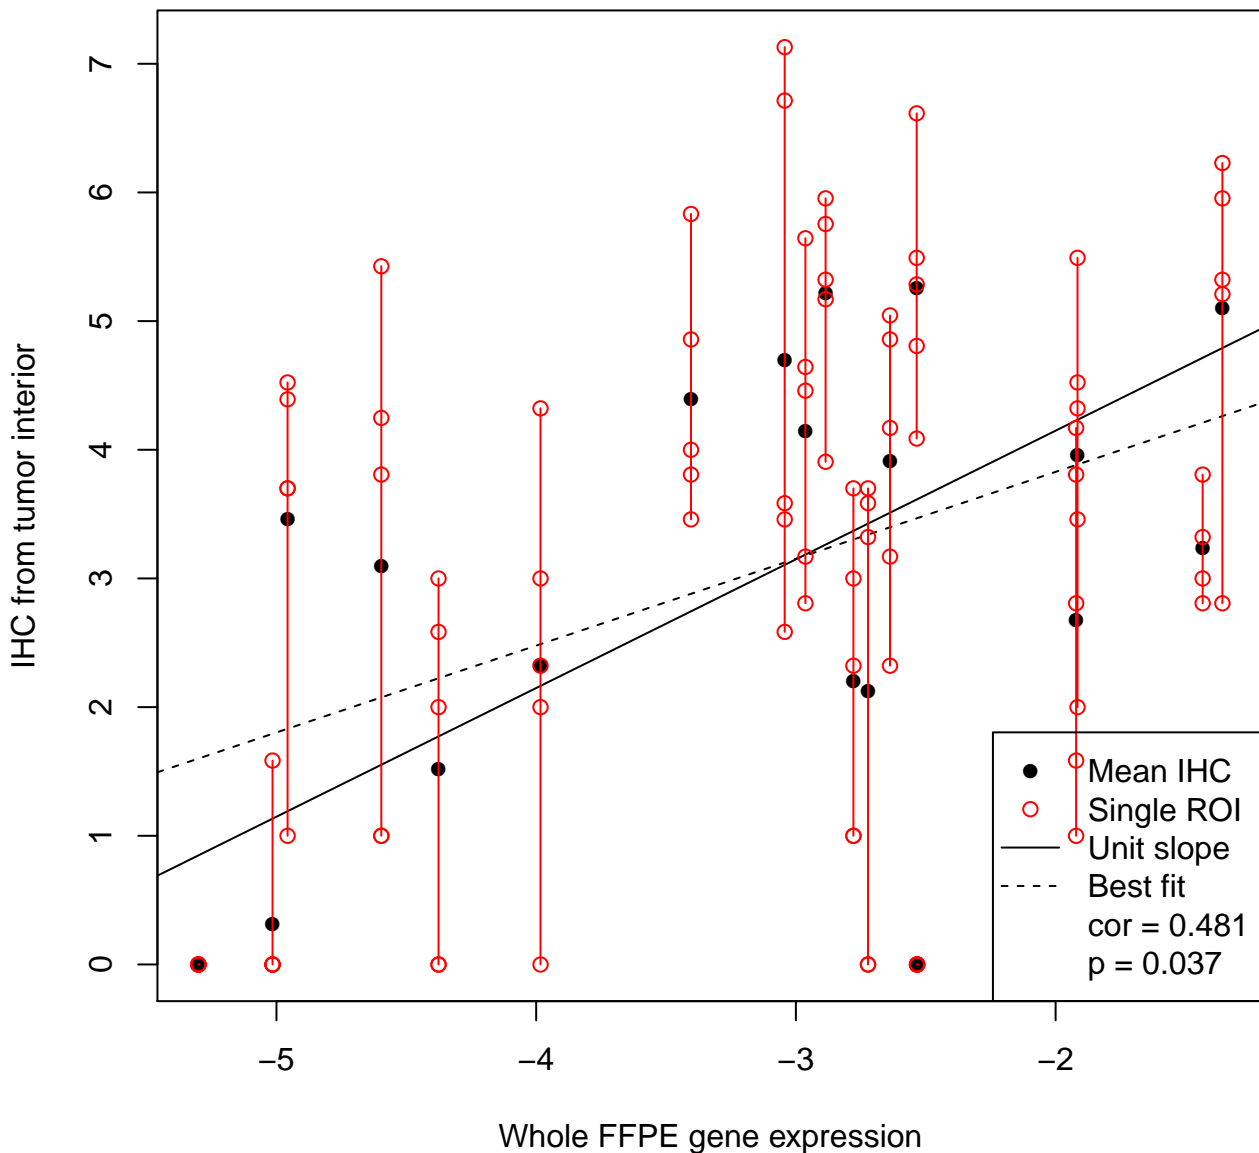

# CD8/CD3 ratio

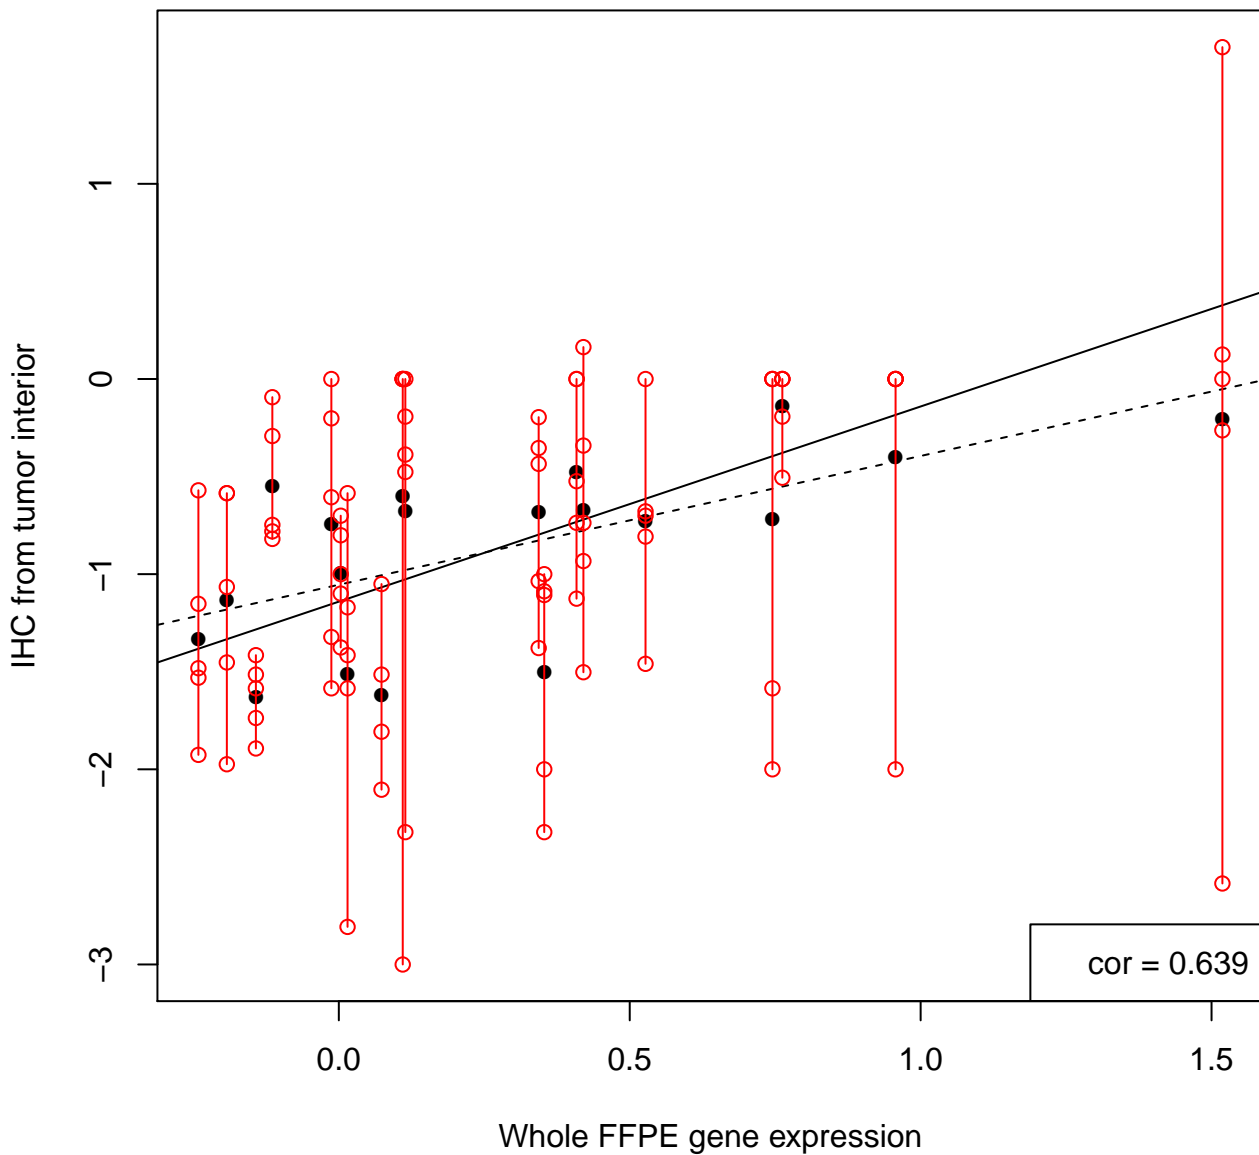

Supplement: Supplementary file [file 068940-8.zip]
